# Supplementary material
Source: publisher site journal article supplement (https://www.dovepress.com/article/359047)
Supplement: Supplementary file 1 [file get_supplementary_file.php]

**Consolidated criteria for reporting qualitative studies (COREQ): 32-item checklist**

| Domain 1: Research team and reflexivity | |
| --- | --- |
| Personal Characteristics |  |
| 1. Interviewer / facilitator | Renata Nunes Achar Fujii conducted the data collect |
| 1. Credencials | Graduated in Medicina at Faculty of Medical Sciences of Santos |
| 1. Occupation | At the time the researcher worked as a doctor and professor at the Municipal University of São Caetano do Sul (USCS) |
| 1. Gender | Female |
| 1. Experience and training | The researcher was supervised, oriented by two researchers with extensive experience in qualitative research, being supervisors of the medical sciences program |
| Relationship with participants |  |
| 1. Relationship established | From the fifth semester on, the students had already had classes with the researcher |
| 1. Participant knowledge of the interviewer | The students knew that the researcher was a teacher and was doing the master's project |
| 1. Interviewer characteristics | There was transparency in the presentation of the research project and there was no conflict of interest |
|  |  |
| **Domain 2: study design** |  |
| Theoretical framework |  |
| 1. Methodological orientation and Theory | Content analysis |
| 1. Sampling | All students were invited to participate |
| 1. Method of approach | The researcher personally invited all classes to participate |
| 1. Sample size | 462 students |
| 1. Non-participation | 124 students did not participate. They were not asked about the reason for the refusal |
| Setting |  |
| 1. Setting of data collection | The data was collected at the University |
| 1. Presence of non-participants | Only the researcher was in the classroom |
| 1. Description of sample | 78.43% of students agreed to participate in the survey, approximately 20% of students in each semester. The average age was 22.72 years with a prevalence of female students (65.6%) |
| Data collection |  |
| 1. Interview guide | No |
| 1. Repeat interviews | No |
| 1. Audio/visual recording | The answers were written in a printed questionnaire |
| 1. Field notes | Yes |
| 1. Duration | There was no time limit to answer the questionnaire |
| 1. Data saturation | Yes |
| 1. Transcripts returned | No |
|  |  |
| **Domain 3: analysis and findings** |  |
| Data analysis |  |
| 1. Number of data coders | One researcher transcribed the data from the questionnaires |
| 1. Description of the coding tree | No |
| 1. Derivation of themes | Themes were derived from the data |
| 1. Software | No |
| 1. Participant checking | No |
| Reporting |  |
| 1. Quotations presented | Participants quotations were presented to illustrate the themes |
| 1. Data and findings consistent | Yes |
| 1. Clarity of major themes | Yes |
| 1. Clarity of minor themes | Yes |

**Note**: Adapted with Tong A, Sainsbury P, Craig J. Consolidated criteria for reporting qualitative research (COREQ): a 32-item checklist for interviews and focus groups. Int J Qual Health Care. 2007;19:349–357, by permission of Oxford University Press.7
